# Supplementary material
Source: MDPI journal article supplement (https://www.mdpi.com/2311-7524/9/4/513)

1 **Figure S1.** Nucleotide sequence of the *VaSTS11d* transgene, 135-nt intron is highlighted with an underscore and a thick font.

5'-ATGGCGTCTGTGGAGGAAATTAGAAATGCTCAGCGTGCCAAGGGTCCGGCCACCGTTCTAGCCATTGGCACAGCTACCCCGGACAACGTGTCTGTACCAGTCTGATTCGCTGATTACTATTTTCGGG  
TCACTAAGAGCGAGCACATGACCGAGCTCAAGAAGAAGTTCAACCGCATTTGT**AAGTCTAATTTTAACATCCTTTTCATACATATAATTATGTATACATATACTCACTTGAACAATATTGATCATCTTGA**  
**ACAATCAAACCTGGCTCCTTGAGCTAACATATTAGTATTATTAATAATTTATATACAGG**TGATAAATCAATGATCAAGAAGCGTTATAGTCATTTGACCGAAGAAATGCTTGAGGAGCACCCAAACATC  
GGTGCTTATATGGCTCCATCTCTTAACATACGTCAAGAGATTATTACTGCTGAGGTACCCAAGCTTGTAAGGAAGCGGCATTGAAGGCTCTTAAAGAGTGGGGTCAACCCAAATCCAAGATTACCCAT  
CTTGATTTTTGTACAACCTCGGGTGTAGAAATGCCGGTGCCGACTATAAACTAGCTAATCTCCTAGGCCCTTGAAACATCAGTCAAAAGAGTAATGTTGTACCATCAAGGGTGCTATGCAGGTGGAAC  
GTCCTTCGAACCGCTAAGGATCTTGCTGAGAATAATGCAGGAGCACGGGTTCTCGTGGTGTGCTCTGAGATCACCGTTGTTACATTCCGTGGGCCTTCTGAAATTGCTTTGGACTCTTTAGTTGGCCAAG  
CCCTTTTGGGGATGGTTCTGCAGCTGTAATTGTTGGATCAGATCCAGATCTCTCGATTGAACGACCACTCTCCAGCTAGTCTCGGCGGCCCAAACATTCATCCCAATACCCAAGGTGCTATTGCAGG  
CAACTTACGTGAAGTGGGTCTCACCTTTCAATTTATGGCCTAATGTGCCAATTTGACCTCCGAAAATATTGAGAAATGTTTGACTCAGGCTTTTGACCAATTGGAATCAGCGATTGGAATTCCTTATTTT  
GGATTGCTCATCCAGGTGGCCGAGCTATTCTTGATGCAGTTGAAGCAAAATTGAGTTTGGATAAAACAAAACCTTAAAGCAACAAGACATGTTCTAAGTGAATATGGGAACATGTCAAGTGCTTGTGTCT  
TGTTTATTATGGACGAGATGAGAAAGAAATCGTTGAAGGAACAAAAACAACAACAGGTGAAGGATTGATTGGGGCGTCTGTTTGGCTTTGGACCAGGCCTAACCATCGAGACTGTTGTCCTCCAC  
AGTATTCCTAGGGATTCCAATTGA-3'

2

3 **Table S1.** The content of individual stilbenes (mg per g of the dry weight (DW)) in the transgenic cell lines of *Vitis amurensis* transformed with *VaSTS11d* or *VaSTS11c*  
4 gene transcripts.

| Cell lines | Overexpressed <i>STS</i> transcript | <i>t</i> -resveratrol diglucoside | <i>t</i> -piceid         | <i>cis</i> -piceid      | <i>t</i> -piceatannol   | <i>t</i> -resveratrol    | <i>cis</i> -resveratrol | ε-viniferin             | δ-viniferin              |
|------------|-------------------------------------|-----------------------------------|--------------------------|-------------------------|-------------------------|--------------------------|-------------------------|-------------------------|--------------------------|
| VC         | -                                   | 0.23 ±0.12 <sup>ab</sup>          | 0.11 ±0.09 <sup>ab</sup> | 0.01 ±0.01 <sup>a</sup> | 0 <sup>a</sup>          | 0.55 ±0.36 <sup>d</sup>  | 0.01 ±0.01 <sup>a</sup> | 0.02 ±0.01 <sup>c</sup> | 0.34 ±0.21 <sup>c</sup>  |
| 11d-1      | <i>VaSTS11d</i>                     | 0.15 ±0.04 <sup>ab</sup>          | 0.13 ±0.04 <sup>a</sup>  | 0 <sup>a</sup>          | 0.01 ±0.01 <sup>a</sup> | 3.25 ±1.14 <sup>bc</sup> | 0.01 ±0.01 <sup>a</sup> | 0.05 ±0.02 <sup>c</sup> | 0.13 ±0.03 <sup>bc</sup> |
| 11d-2      |                                     | 0.33 ±0.15 <sup>a</sup>           | 0.11 ±0.04 <sup>ab</sup> | 0 <sup>a</sup>          | 0.01 ±0.01 <sup>a</sup> | 7.69 ±1.04 <sup>a</sup>  | 0.01 ±0.01 <sup>a</sup> | 0.10 ±0.02 <sup>c</sup> | 0.18 ±0.07 <sup>c</sup>  |
| 11d-3      |                                     | 0.35 ±0.15 <sup>a</sup>           | 0.10 ±0.04 <sup>ab</sup> | 0 <sup>a</sup>          | 0.01 ±0.01 <sup>a</sup> | 6.52 ±1.07 <sup>a</sup>  | 0.01 ±0.01 <sup>a</sup> | 0.10 ±0.03 <sup>c</sup> | 0.18 ±0.06 <sup>c</sup>  |
| 11c-1      | <i>VaSTS11c</i>                     | 0.30 ±0.07 <sup>ab</sup>          | 0.06 ±0.02 <sup>ab</sup> | 0.01 ±0.01 <sup>a</sup> | 0.01 ±0.01 <sup>a</sup> | 1.83 ±0.93 <sup>cd</sup> | 0.01 ±0.01 <sup>a</sup> | 0.02 ±0.01 <sup>b</sup> | 0.08 ±0.02 <sup>b</sup>  |
| 11c-2      |                                     | 0.11 ±0.05 <sup>b</sup>           | 0.04 ±0.02 <sup>b</sup>  | 0.01 ±0.01 <sup>a</sup> | 0.01 ±0.01 <sup>a</sup> | 2.92 ±0.47 <sup>bc</sup> | 0.01 ±0.01 <sup>a</sup> | 0.49 ±0.07 <sup>b</sup> | 0.77 ±0.05 <sup>b</sup>  |
| 11c-3      |                                     | 0.09 ±0.05 <sup>b</sup>           | 0.04 ±0.02 <sup>b</sup>  | 0.01 ±0.01 <sup>a</sup> | 0.01 ±0.01 <sup>a</sup> | 2.42 ±0.42 <sup>bc</sup> | 0.01 ±0.01 <sup>a</sup> | 0.04 ±0.01 <sup>a</sup> | 0.07 ±0.02 <sup>a</sup>  |

5

6 VC – control cell line of *V. amurensis* transformed with the vector harboring only the *npHII* selective marker; 11d-1, 2, 3 – *V. amurensis* cell lines transformed with the *VaSTS11d*  
7 transgene; 11c-1, 2, 3 – *V. amurensis* cell lines transformed with the *VaSTS11c* transgene. The callus tissue samples were harvested from the 35-day old cell cultures. Means followed by the same letter were not different using Student's t test, where  $p < 0.05$  was considered to be statistically significant.

8 **Table S2.** Primers used for amplification of *Arabidopsis thaliana* and *Vitis amurensis* cDNAs in PCR.

| cDNA                                                                                                                       | Primers names                                  | Primers sequences, 5'-3'                                              |
|----------------------------------------------------------------------------------------------------------------------------|------------------------------------------------|-----------------------------------------------------------------------|
| <b>Primers for obtaining of the full <i>VaSTS11</i> cDNA and generation the construction for plant cell transformation</b> |                                                |                                                                       |
| Full <i>VaSTS11d</i> and <i>VaSTS11c</i> cDNA obtaining                                                                    | VaSTS11-nachS<br>VaSTS11-KonA                  | 5'ATGGCGTCTGTGGAGGAAA,<br>5'TCAATTGGAATCCCTAGGAA                      |
| Overexpression of <i>VaSTS11d</i> and <i>VaSTS11c</i>                                                                      | VaSTS11-Xho-pSATs<br>VaSTS11-Bam-pSATa         | 5'GCTCCTCGAGATGGCGTCTGTGGAGGAAAT,<br>5'TCGAGGATCCTCAATTGGAATCCCTAGGAA |
| <b>Primers for real-time PCRs in <i>A. thaliana</i> plants and grapevine <i>V. amurensis</i> cell cultures</b>             |                                                |                                                                       |
| Overexpression of <i>VaSTS11d</i> and <i>VaSTS11c</i> transgenes                                                           | VaSTS11-Kon-S<br>pSAT-term-A                   | 5'TTCCTAGGGATTCCAATTGA,<br>5'GAG AGA CTG GTG ATT TTT GCG              |
| Total overexpression of <i>VaSTS11</i> gene                                                                                | VaSTS11-real-S2<br>VaSTS11-Kon-A               | 5'TGATGCAGTTGAAGCAAAATTGAGT,<br>5'TCAATTGGAATCCCTAGGAA                |
| <i>VaActin1</i> (DQ517935)                                                                                                 | <i>VaActin</i> -realS<br><i>VaActin</i> -realA | 5'GTATTGTGCTGGATTCTGGTGA,<br>5'GCAAGGTCAAGACGAAGGATAG                 |
| <i>VaGAPDH</i> (AM437491)                                                                                                  | <i>VaGAPDH</i> -realS<br><i>VaGAPDH</i> -realA | 5'CACTGAAGATGATGTTGTTTCC,<br>5'GCTATTCCAGCCTTGGCAT                    |
| <i>AtEF</i> (XM_002864638)                                                                                                 | AtEF-1a-OT-s<br>AtEF-1a-OT-a                   | 5'TGCCCCTGGACATCGTGATT,<br>5'CTTGGGCTCGTTGATCTGGT                     |
| <i>AtGAPDH</i> (NM_111283.4)                                                                                               | AtGapdh-Real-s<br>AtGapdh-Real-a               | 5'TTGGTGACAACAGGTCAAGCA,<br>5'AAACTTGTCGCTCAATGCAAT                   |
| <b>Primers for semiquantitative RT-PCR</b>                                                                                 |                                                |                                                                       |
| <i>nptII</i> (AY818371)                                                                                                    | NPTII-SER-S<br>NPTII-KON-A                     | 5'ATTCGACCACCAAGCGAAAC,<br>5'TCAGAAGAAGCTCGTCAAGAA                    |
| <i>VirB2</i> (KY000054)                                                                                                    | VIRB2-S<br>VIRB2-A                             | 5'ATGCGATGCTTTGAAAGATACCG,<br>5'TTAGCCACCTCCAGTCAGCG                  |
| <b>Primers for bisulfite sequencing</b>                                                                                    |                                                |                                                                       |
| <i>VaSTS11d</i> and <i>VaSTS11c</i> cDNA                                                                                   | VaSTS11-Met-S2<br>VaSTS11-Met-A2               | 5'TCTCACCTTTCATTTATRRC,<br>5'TYAATTGGAATYYYTAGG                       |

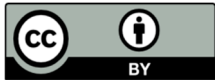

Supplement: s1 [file s1]
